# Supplementary material
Source: PubMed Central journal article supplement (PMC6645046)
Supplement: ao8b00500_si_001.pdf [file ao8b00500_si_001.pdf]

## Supplementary Information

# **Effect of Differences in the Primary Structure of the A-chain on the Aggregation of Insulin Fragments**

Paul P. Nakka<sup>†\*</sup>, Ke Li<sup>†\*</sup> and Daniel Forciniti<sup>†\*</sup>

<sup>†</sup> Kielhorn Research Laboratory, Chemical and Biochemical Engineering Department, Missouri  
University of Science and Technology, Rolla, Missouri 65409, United States

\* To whom correspondence should be addressed:

Email: [forcinit@mst.edu](mailto:forcinit@mst.edu)

Tel: 5733414427

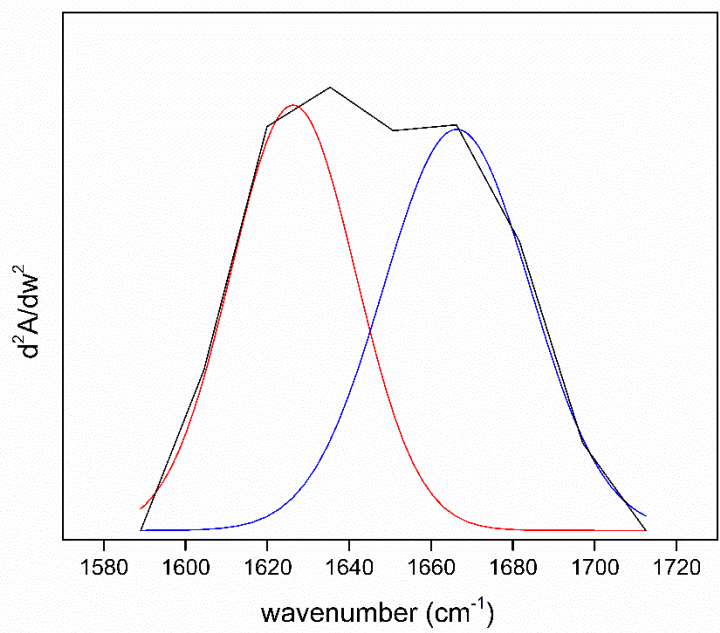

**Figure S1.** Second-derivative spectra for native BIF (—) and its curve-fitted peaks.

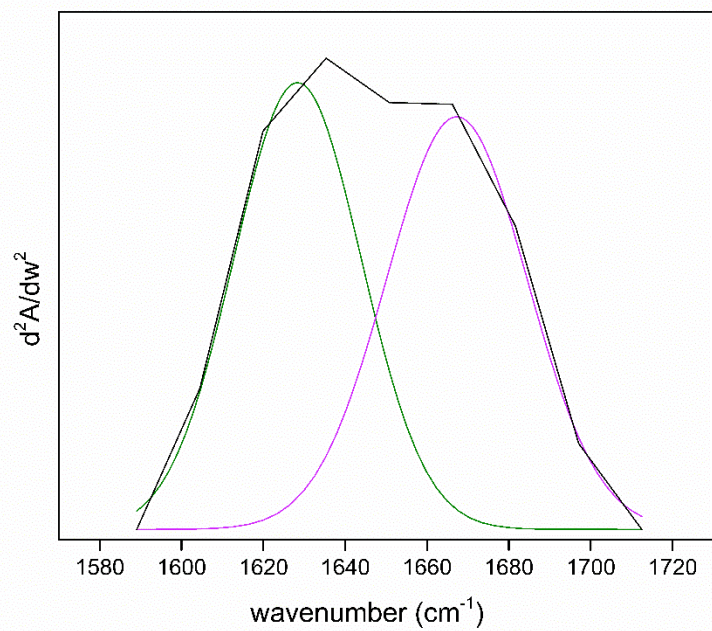

**Figure S2.** Second-derivative spectra for native BIF (—) and its curve-fitted peaks.

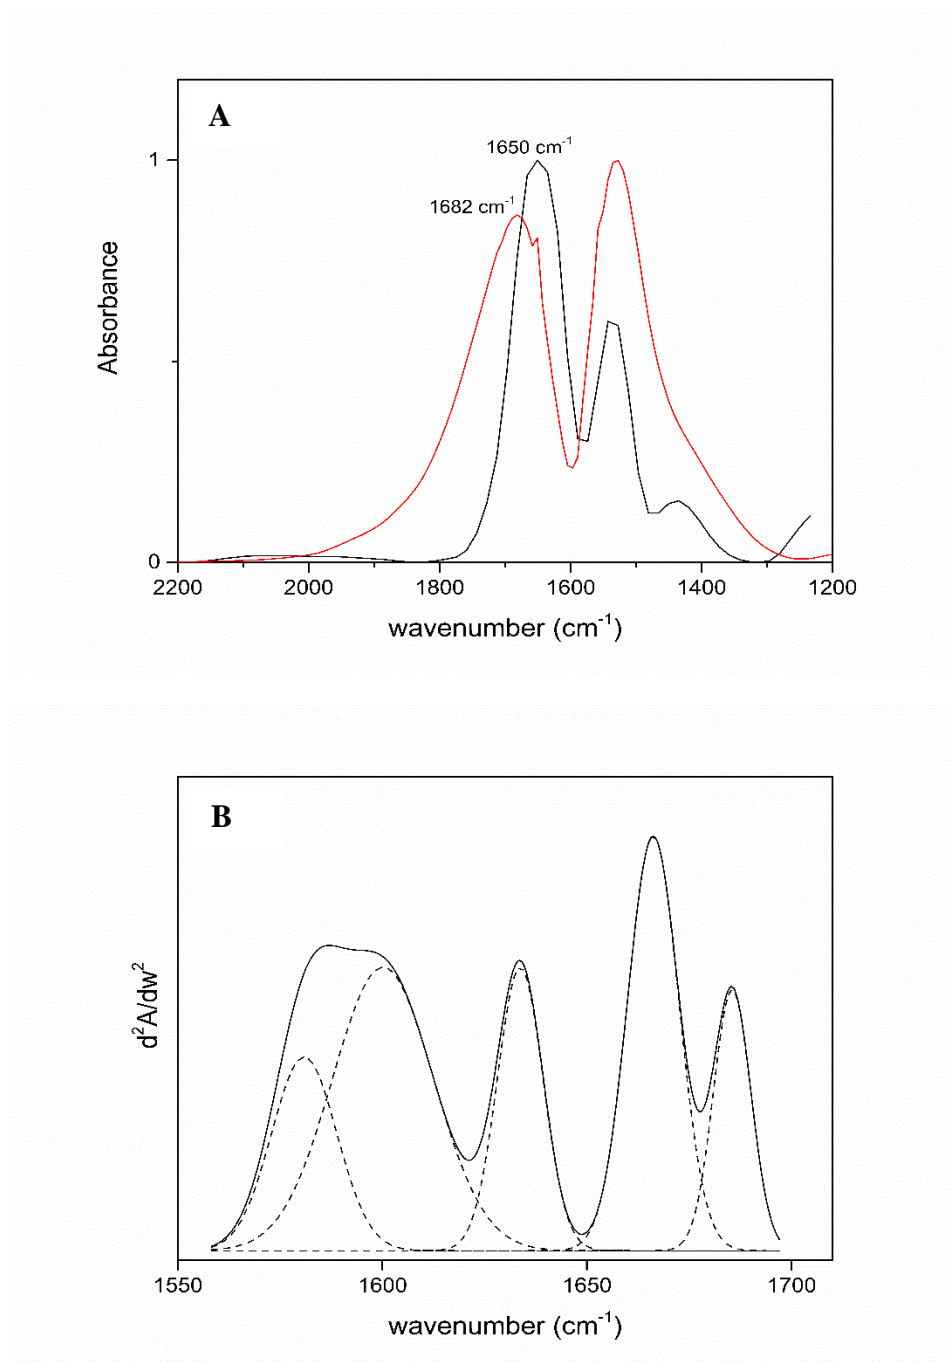

**Figure S3.** A) FTIR spectra for HIF at pH 1.6, 60°C, 1M urea, 0.02M NaCl collected at  $t = 0$  days (—) and  $t = 42$  days (—) showing the shift in the amide I region. B) Second-derivative spectra for HIF at pH 1.6, 60°C, 1M urea, 0.02M NaCl collected at the end of week-1 (—) and its curve-fitted peaks.



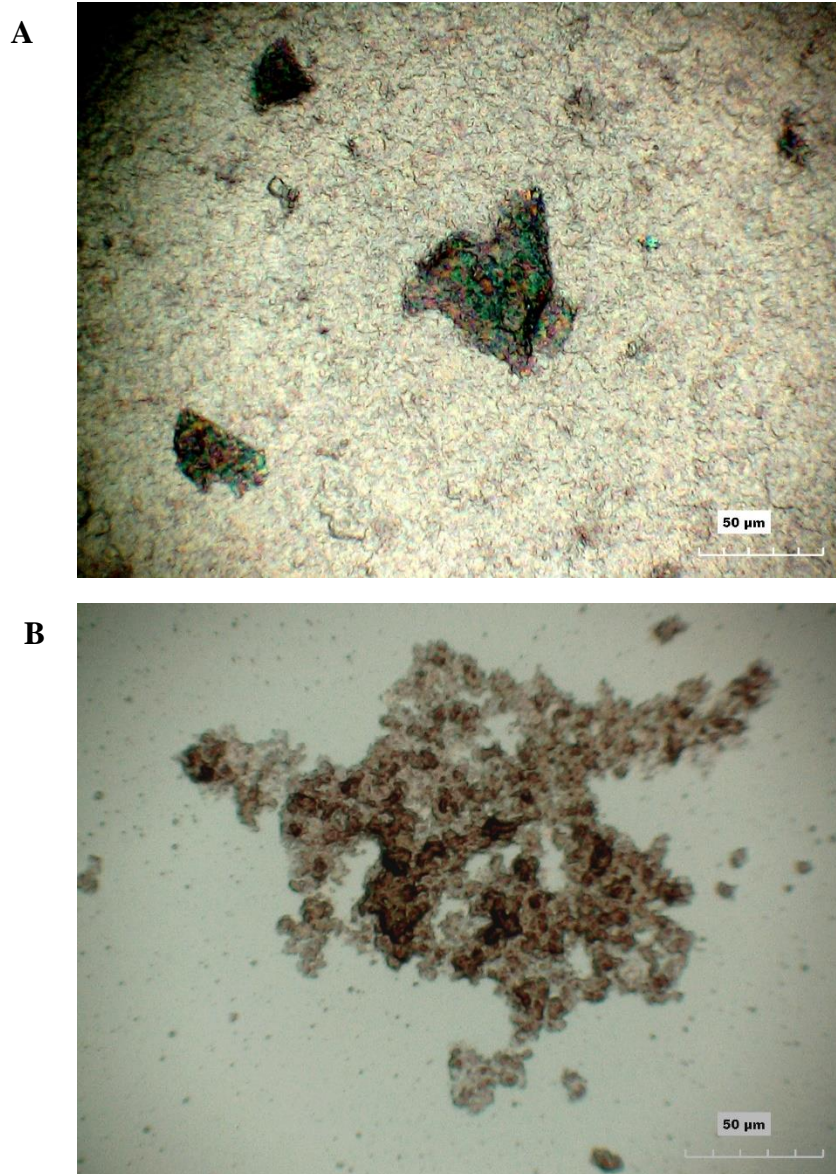

**Figure S4.** Micrographs of the samples stained with Congo Red for A) BIF at pH 1.6, 25°C, 0M urea, 0.02M NaCl B) HIF at pH 1.6, 25°C, 0M urea, 0.02M NaCl.

A

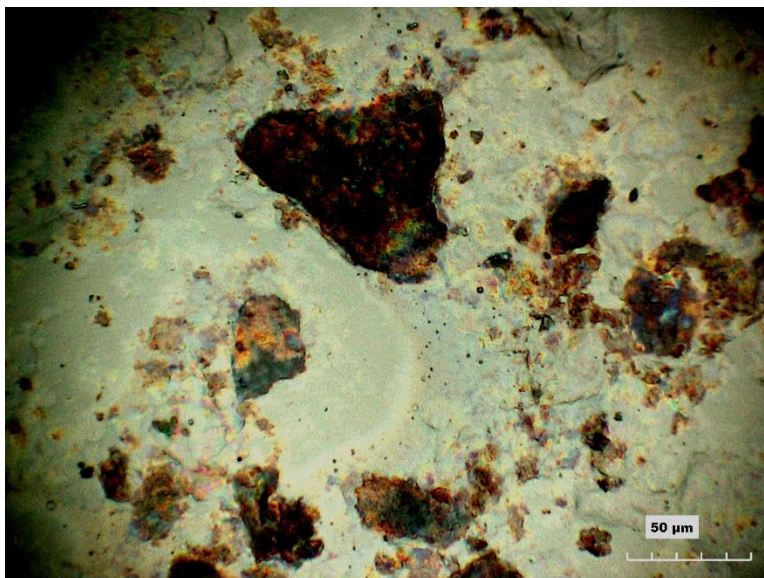

B

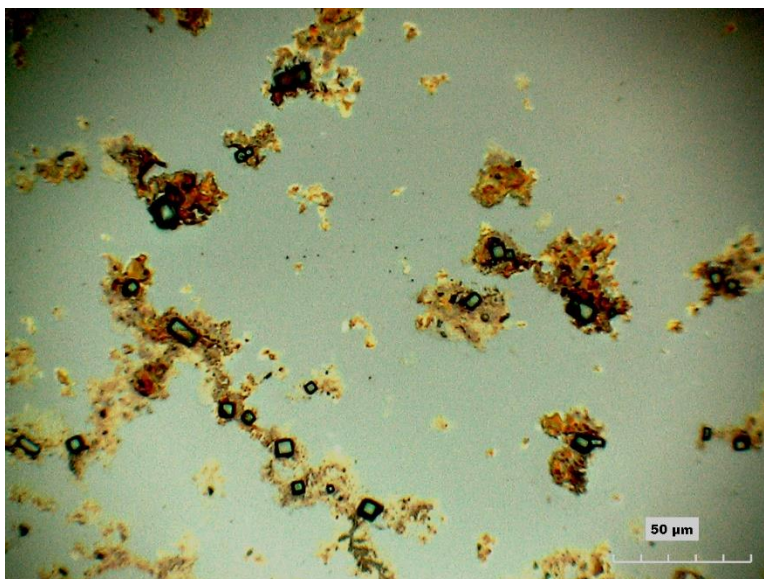

**Figure S5.** Micrographs of the samples stained with Congo Red for A) BIF at pH 1.6, 25°C, M urea, 1M NaCl B) HIF at pH 1.6, 25°C, 1M urea, 1M NaCl.



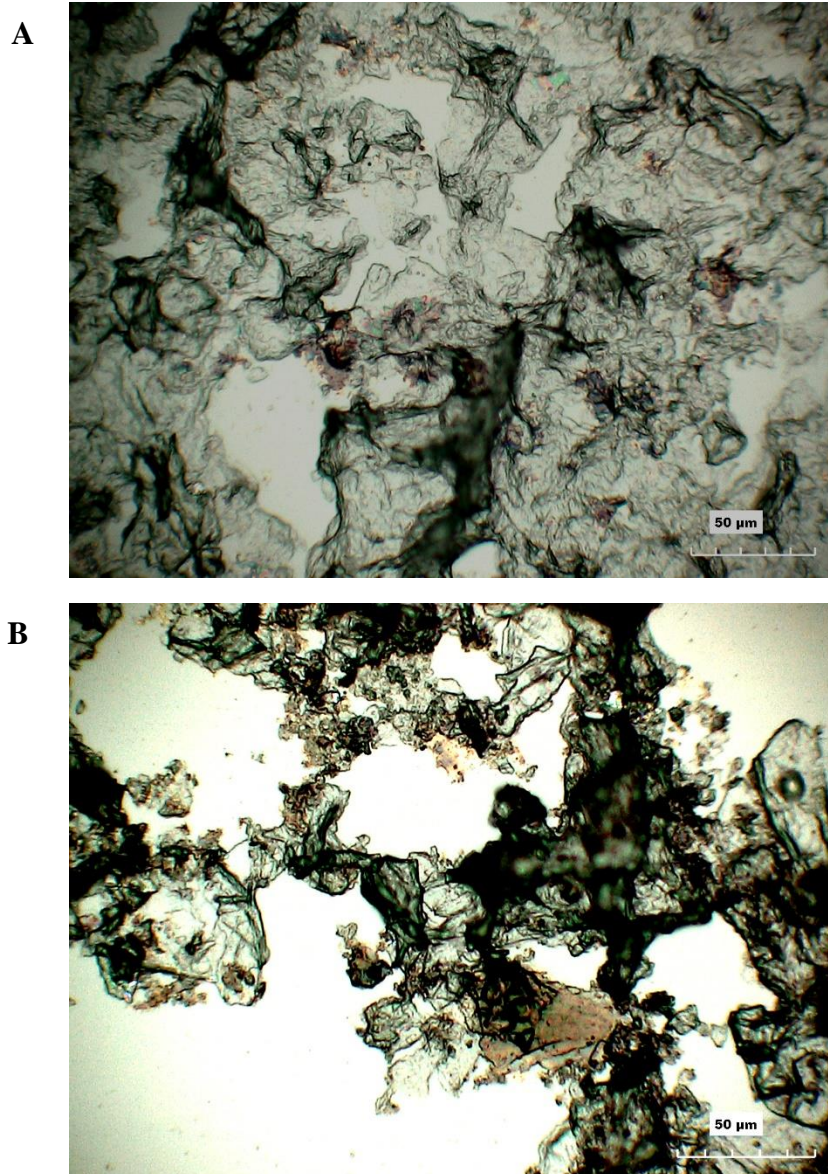

**Figure S6.** Micrographs of the samples stained with Congo Red for A) BIF at pH 1.6, 60°C, 0M urea, 1M NaCl B) HIF at pH 1.6, 60°C, 0M urea, 1M NaCl.

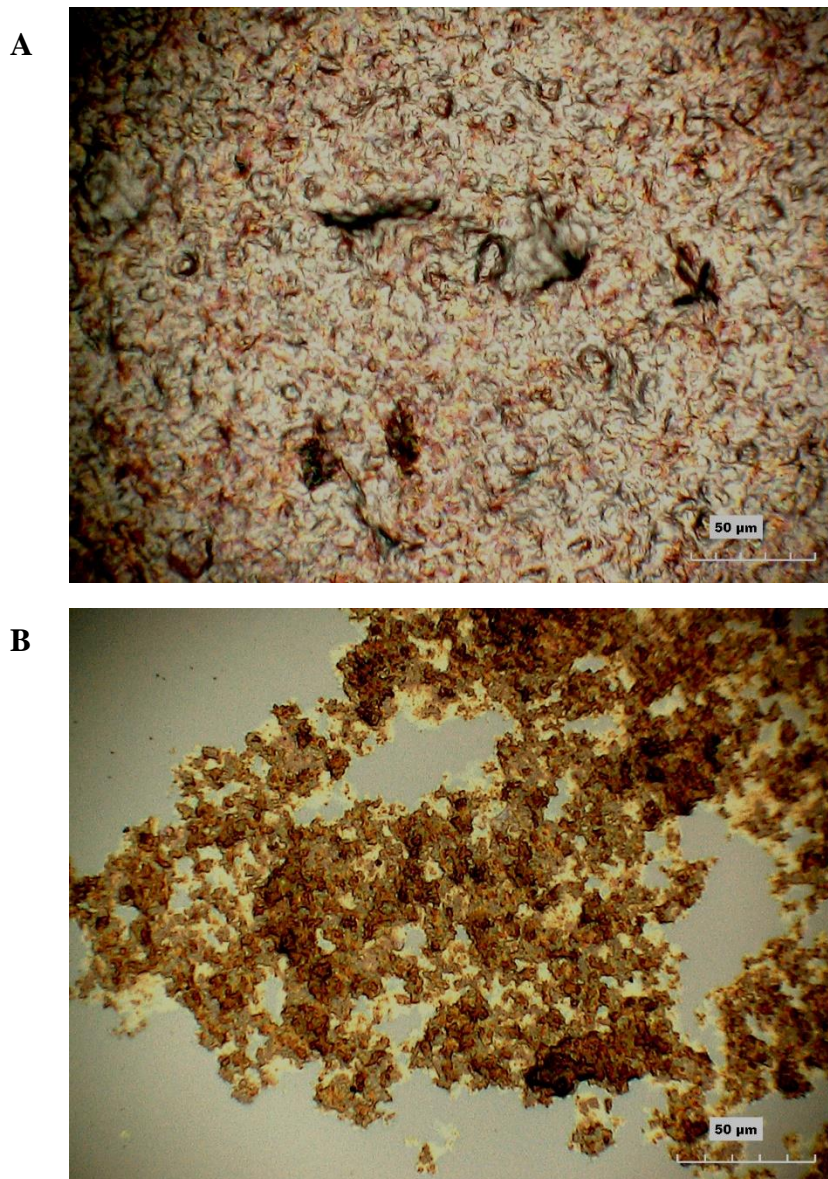

**Figure S7.** Micrographs of the samples stained with Congo Red for A) BIF at pH 5, 25°C, 0M urea, 1M NaCl B) HIF at pH 5, 25°C, 0M urea, 1M NaCl.



**A**

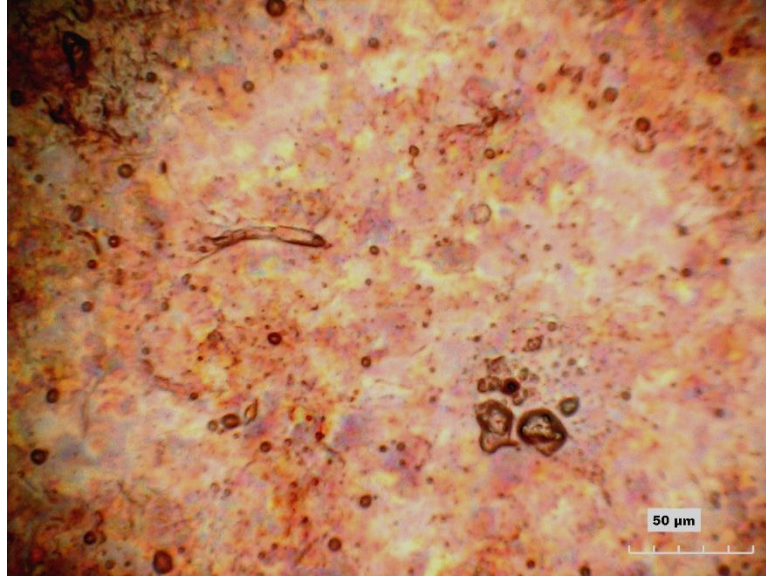

**B**

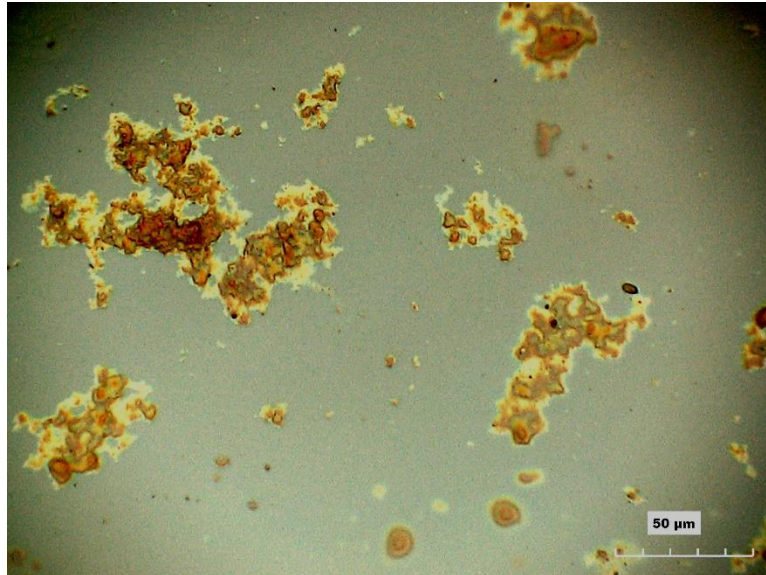

**Figure S8.** Micrographs of the samples stained with Congo Red for A) BIF at pH 5, 25°C, 1M urea, 0.02M NaCl B) HIF at pH 5, 25°C, 1M urea, 0.02M NaCl.



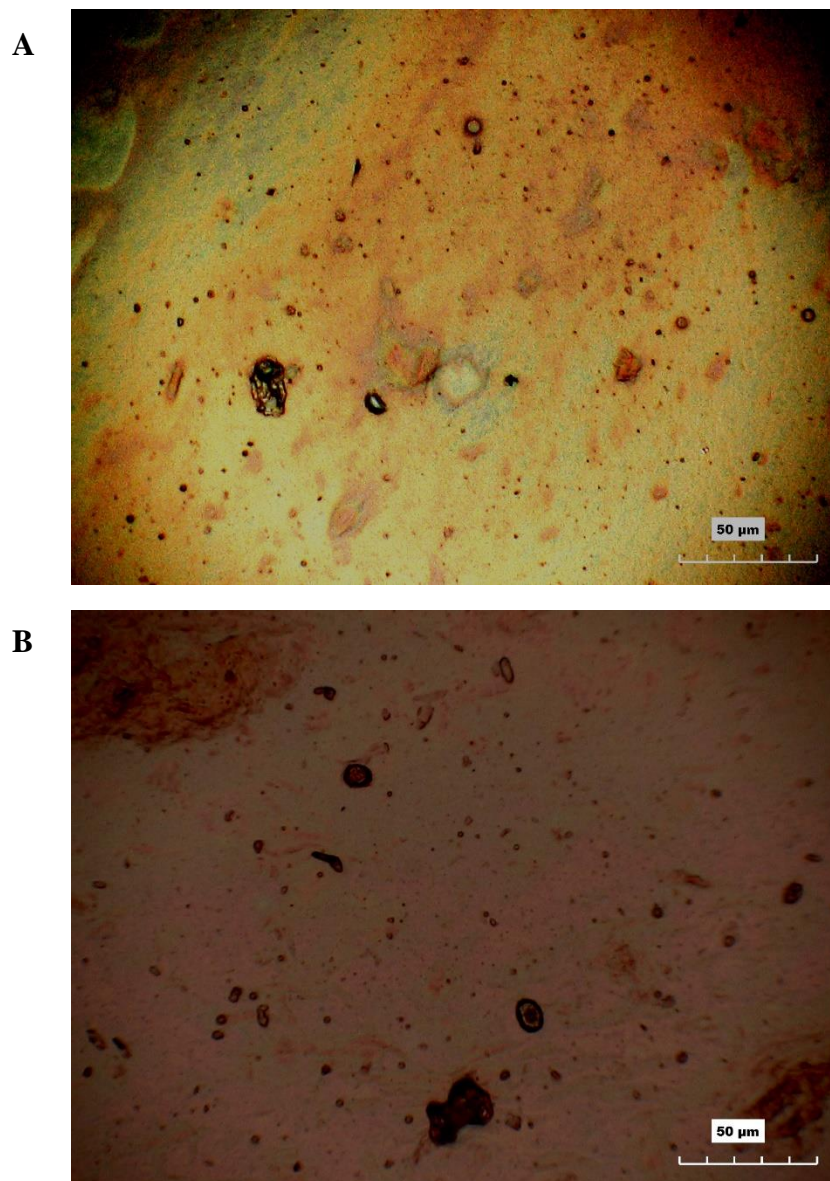

**Figure S9.** Micrographs of the samples stained with Congo Red for A) BIF at pH 5, 60°C, 1M urea, 1M NaCl B) HIF at pH 5, 60°C, 1M urea, 1M NaCl.

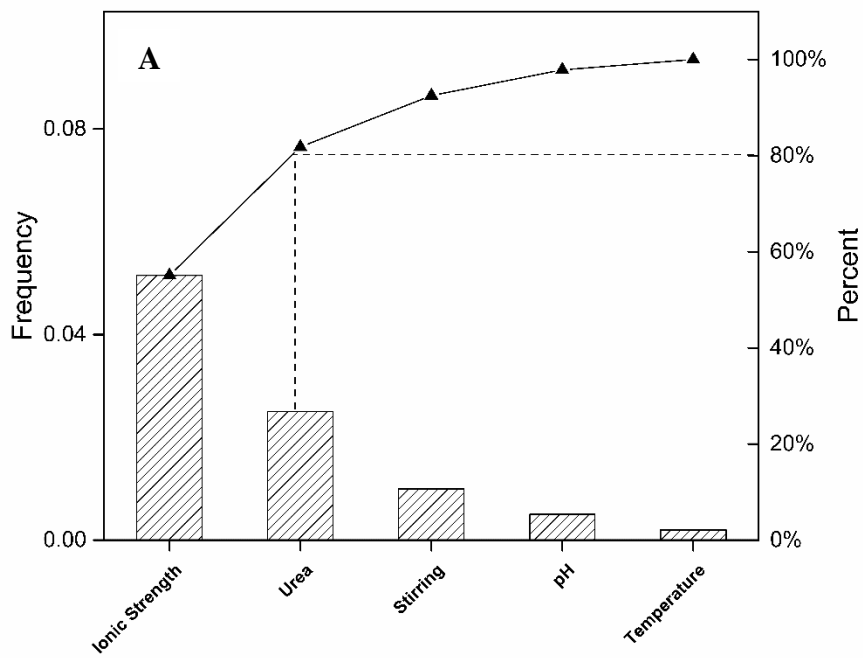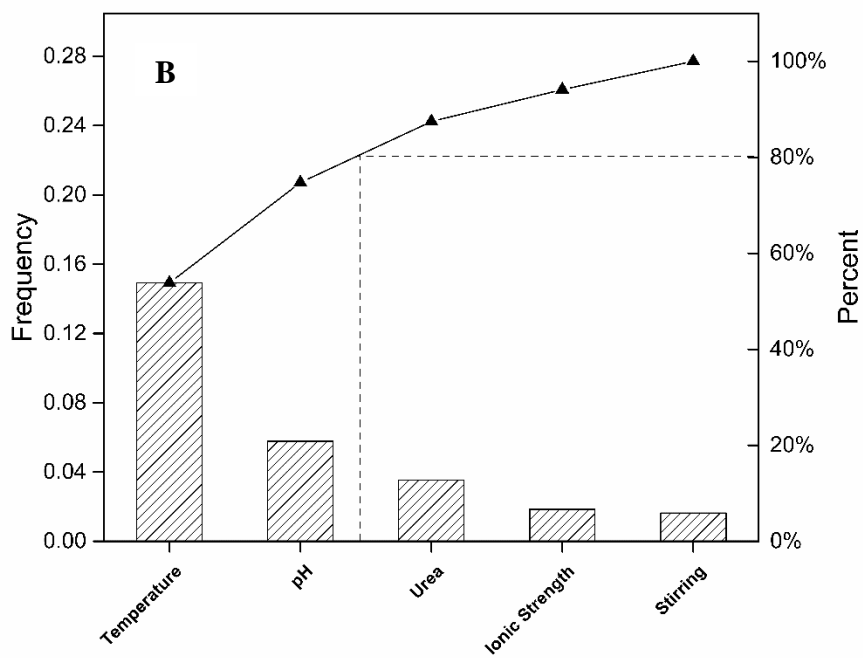

**Figure S10.** Pareto charts showing the effect of various factors based on  $K_{\beta}$  as an outcome from the experimental design FF0508 for A) BIF and B) HIF.

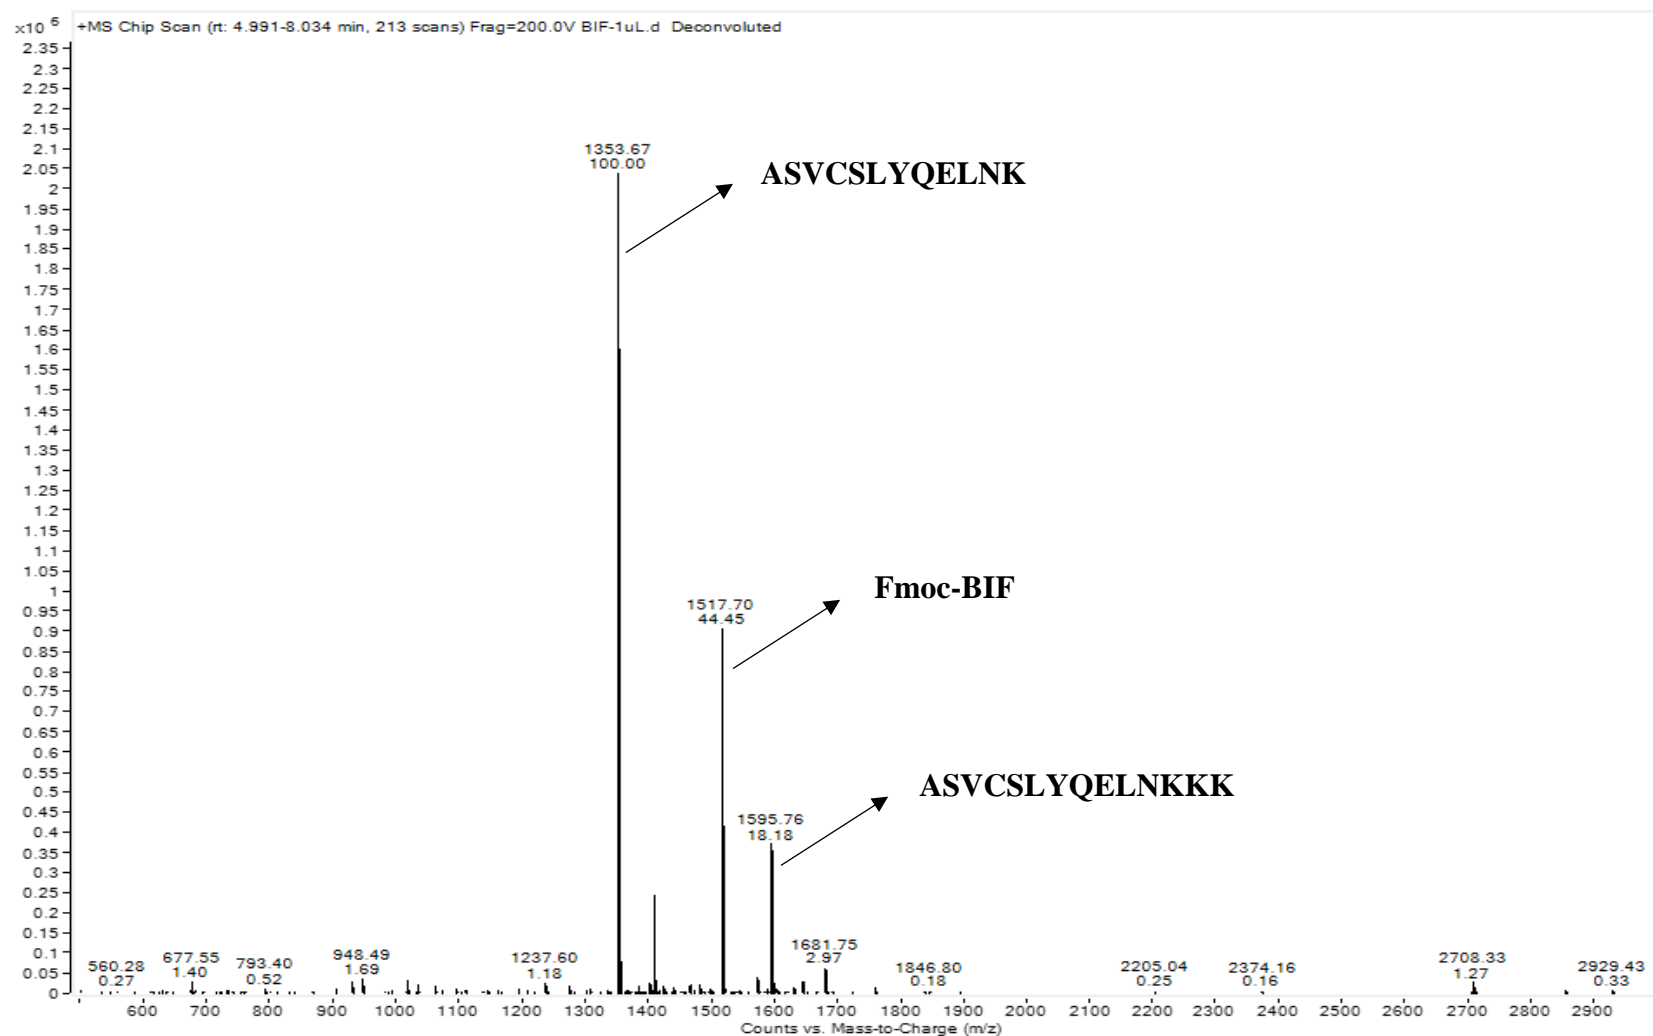

**Figure S11.** LC-MS of native BIF showing the native BIF (with 1 and 3 Lys tail) and impurity (Fmoc-BIF) with their respective mass (top) and relative abundance (below) shown over each peak.



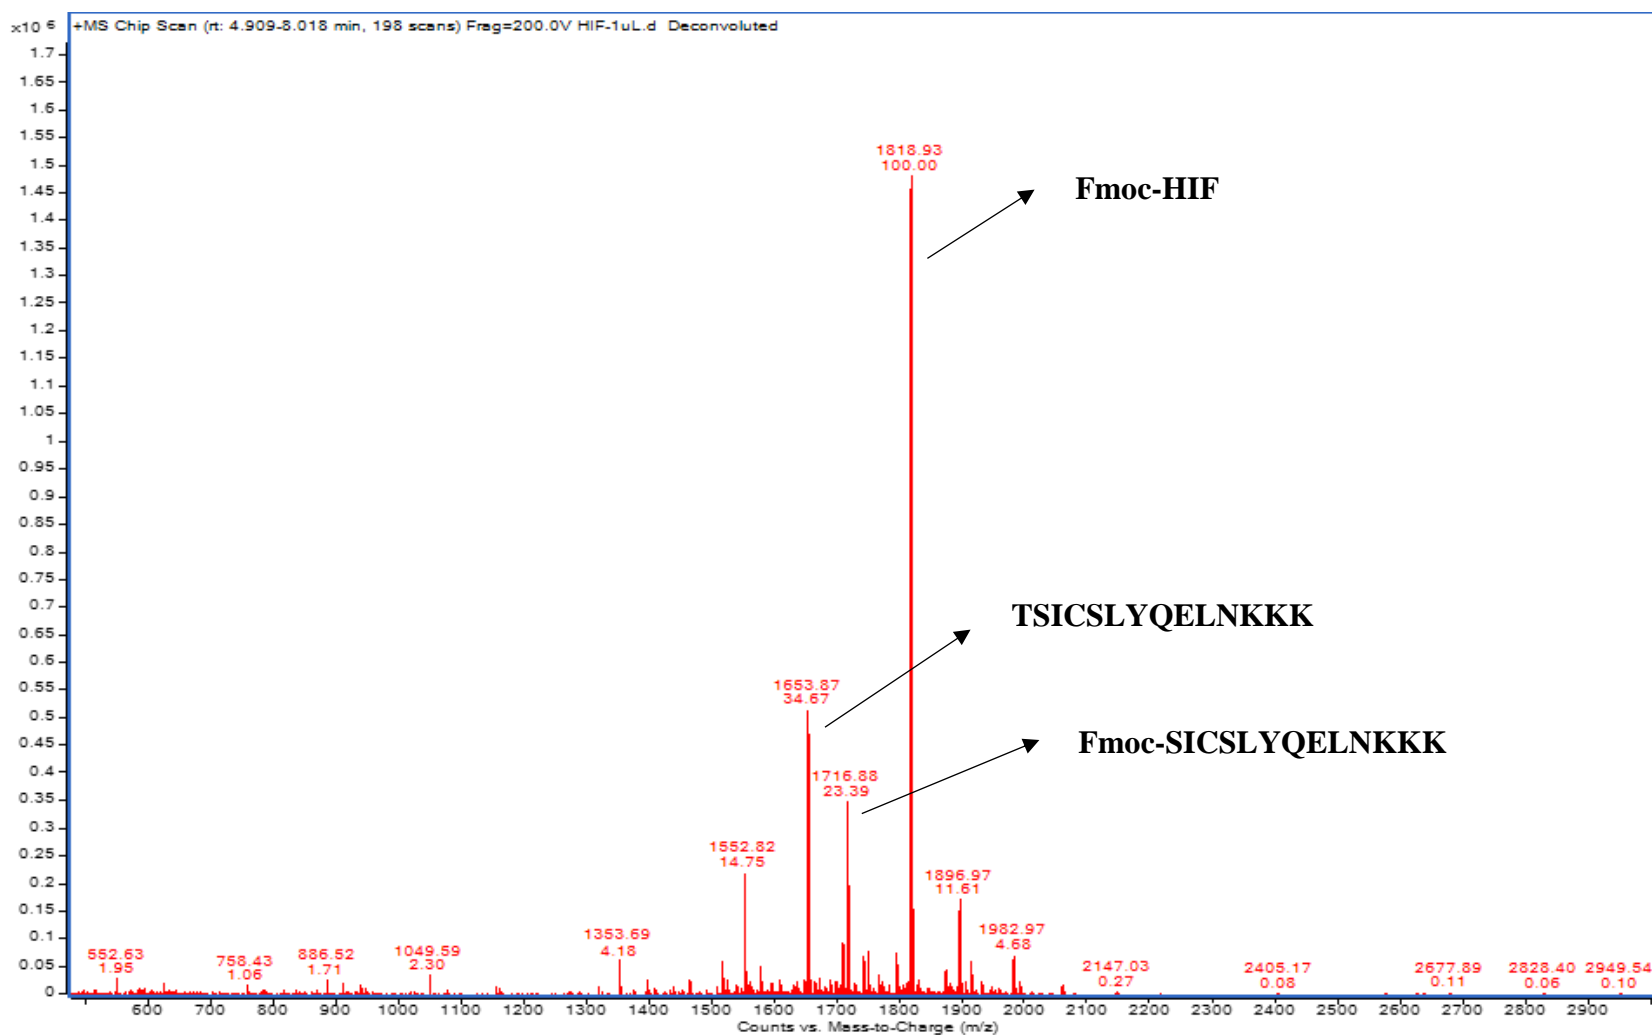

**Figure S12.** LC-MS of native HIF showing the native HIF, truncated HIF (with Fmoc) and impurity (Fmoc-HIF) with their respective mass (top) and relative abundance (below) shown over each peak.

# MS/MS Spectrum of peptide 677.839 m/z (2+); 1353.7 Da

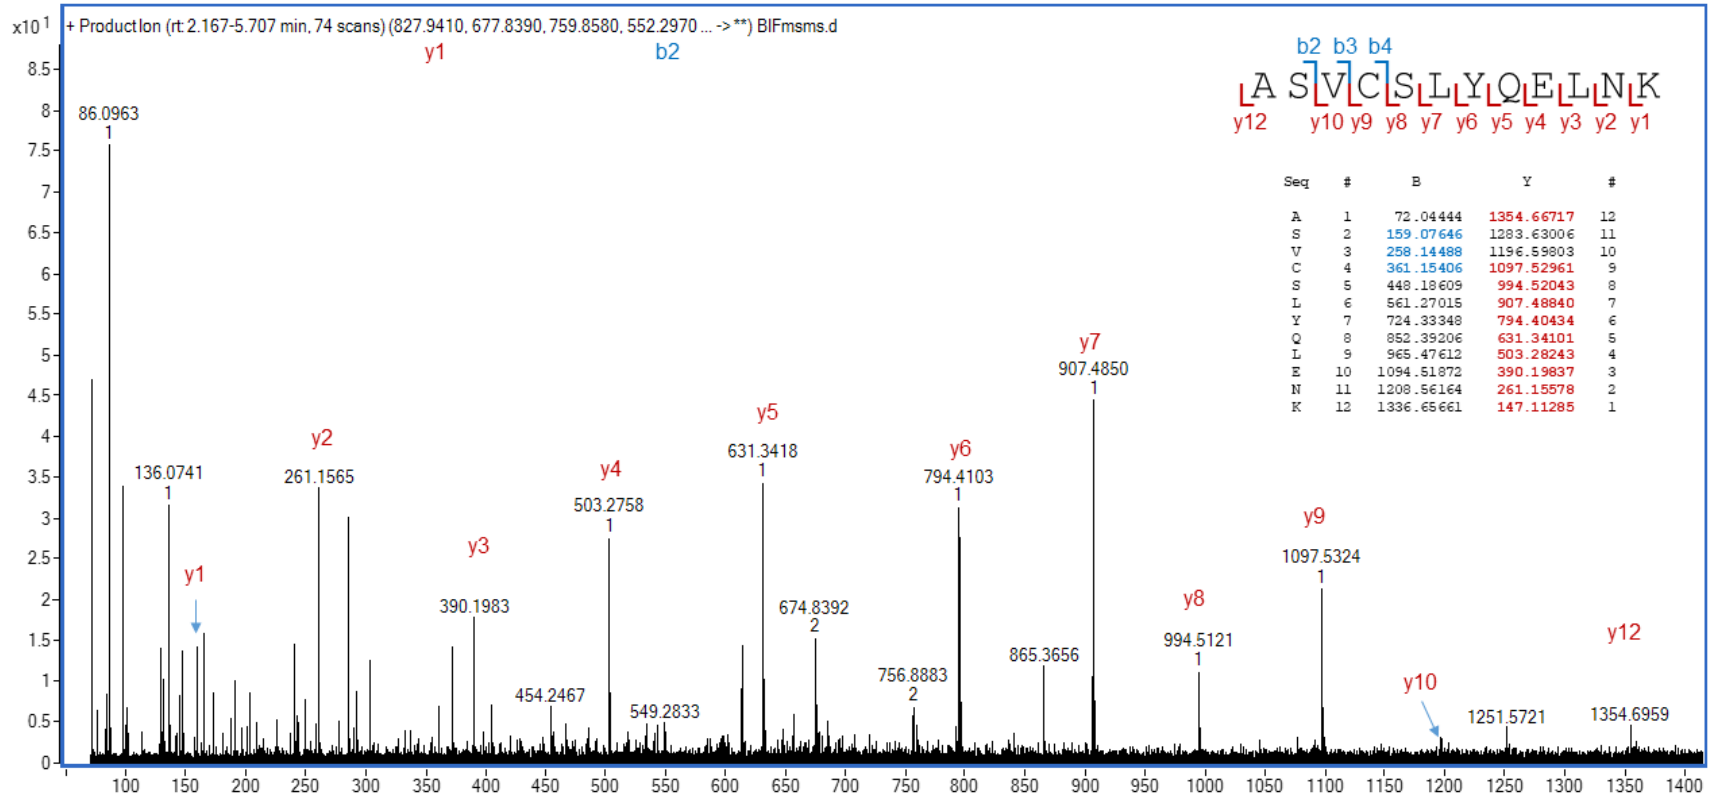

**Figure S13.** LC-MS/MS spectrum of native BIF (1353.7 Da) showing detailed sequence analysis.

# MS/MS Spectrum of peptide 552.297 m/z (3+) 1654.88 Da

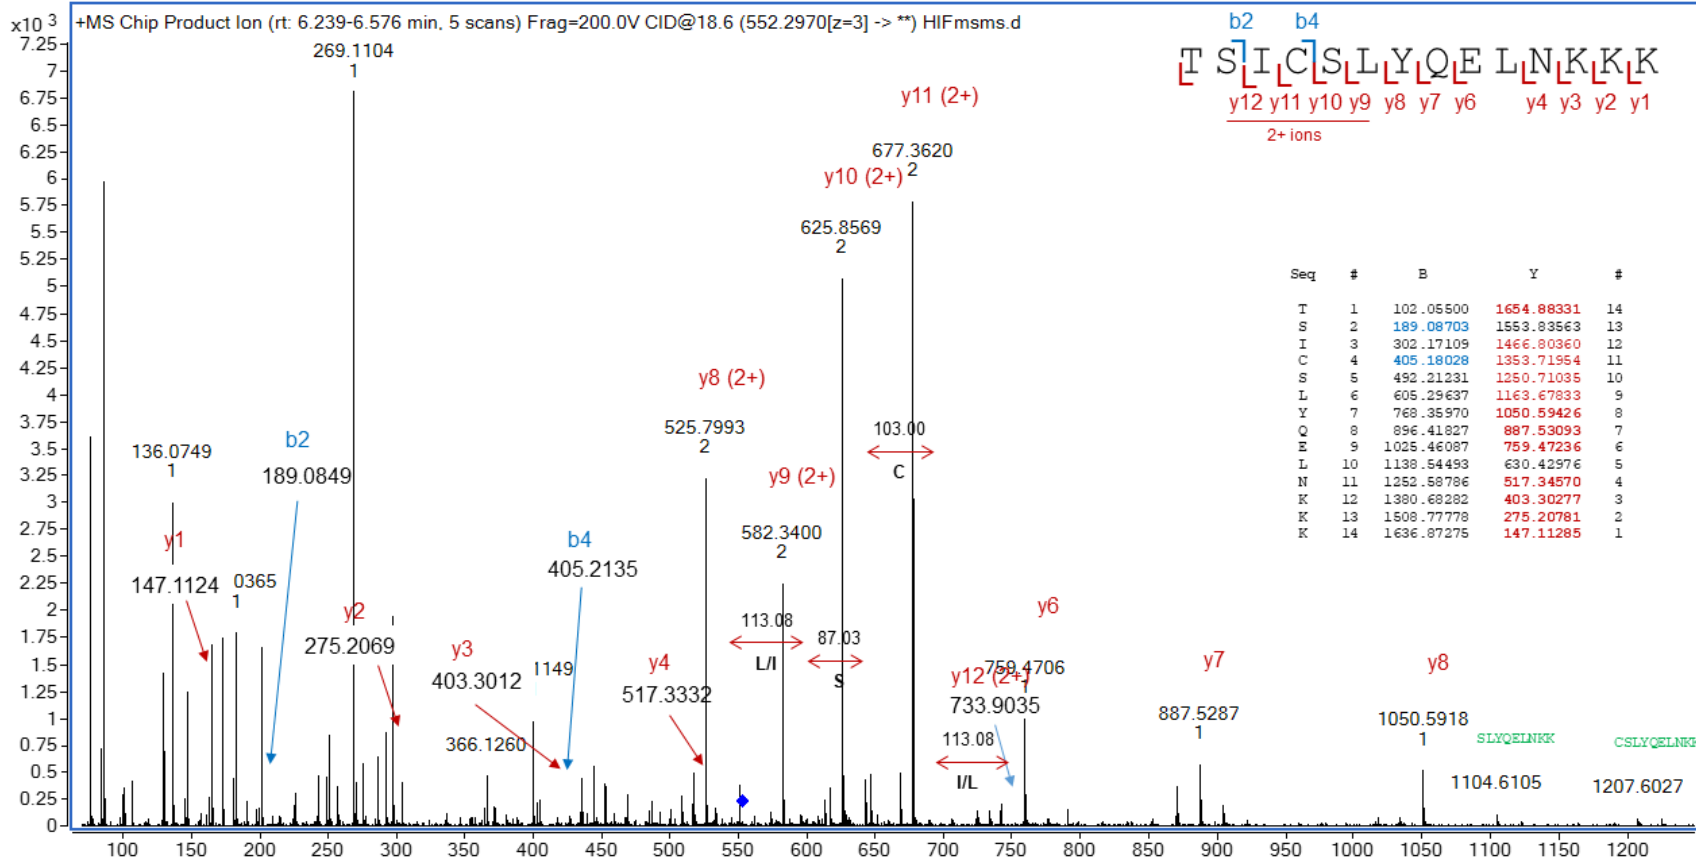

**Figure S14.** LC-MS/MS spectrum of native HIF (1654.88 Da) showing detailed sequence analysis.



Bovine4-1000\_XT\_00001\_M\_180522105522 #2 RT: 2.00 AV: 1 NL: 1.47E7  
T: FTMS + p NSI Full ms [300.00-2000.00]

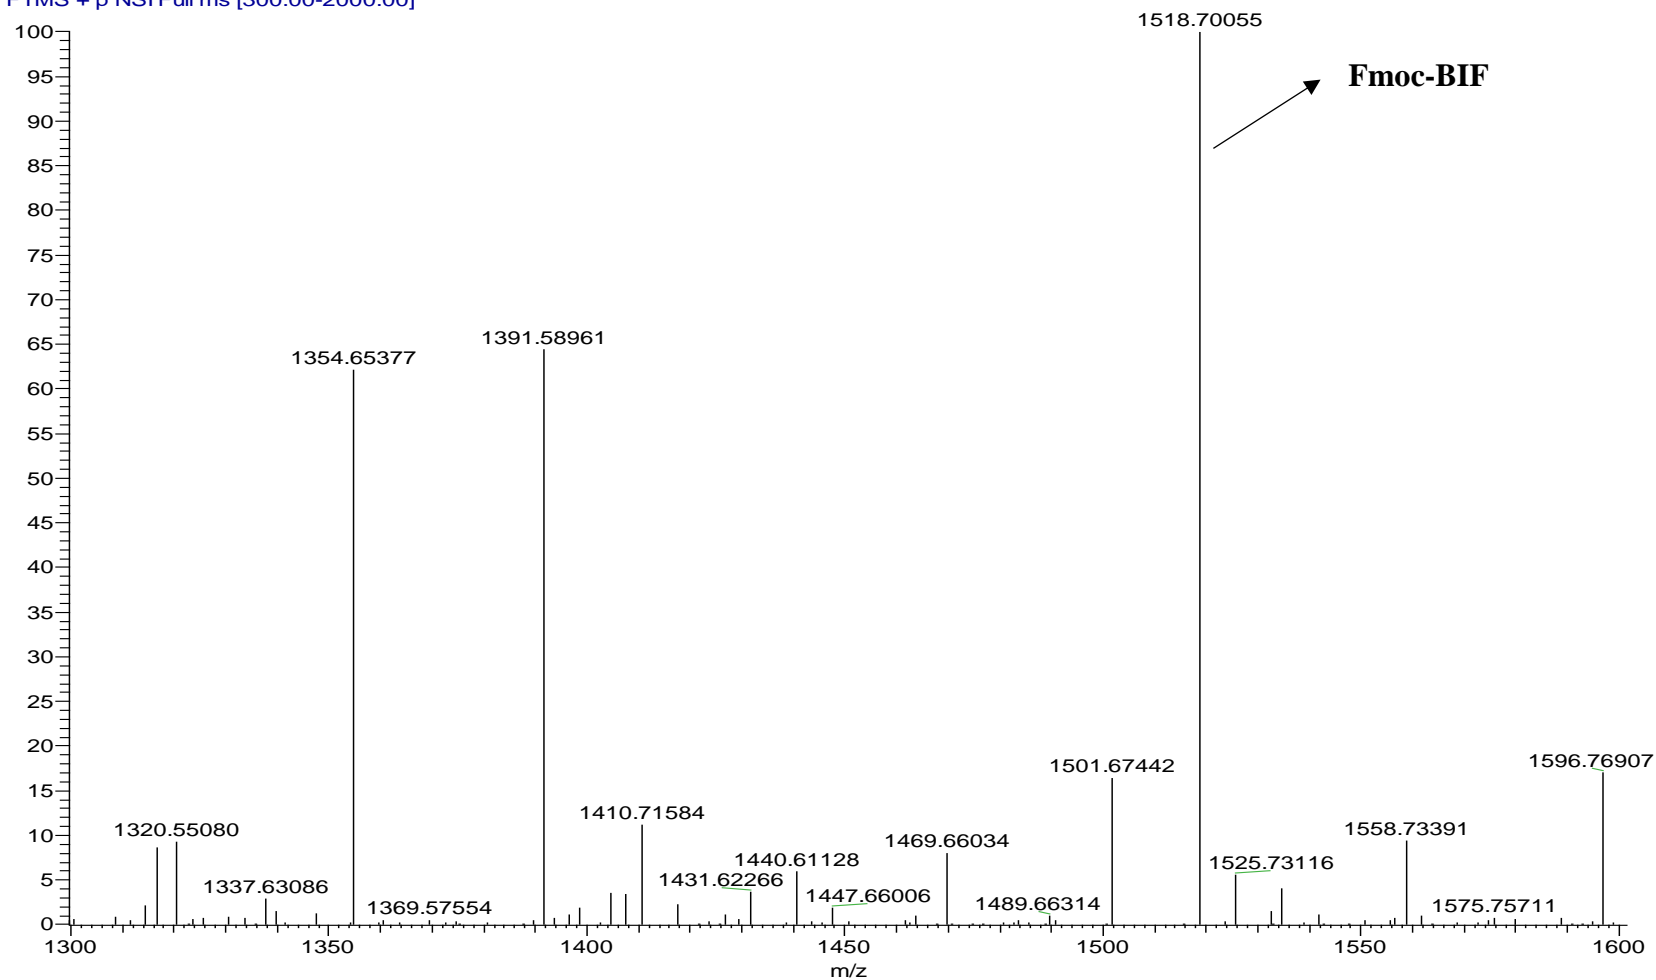

**Figure S15A.** LC-MS graph of fibrils obtained after the experiment for BIF at pH 1.6, 60°C, 1M urea, 0.02M NaCl showing the relative abundance of Fmoc-BIF.

Bovine6-1000\_XT\_00001\_M\_#2 RT: 2.00 AV: 1 NL: 6.60E7  
T: FTMS + p NSI Full ms [300.00-2000.00]

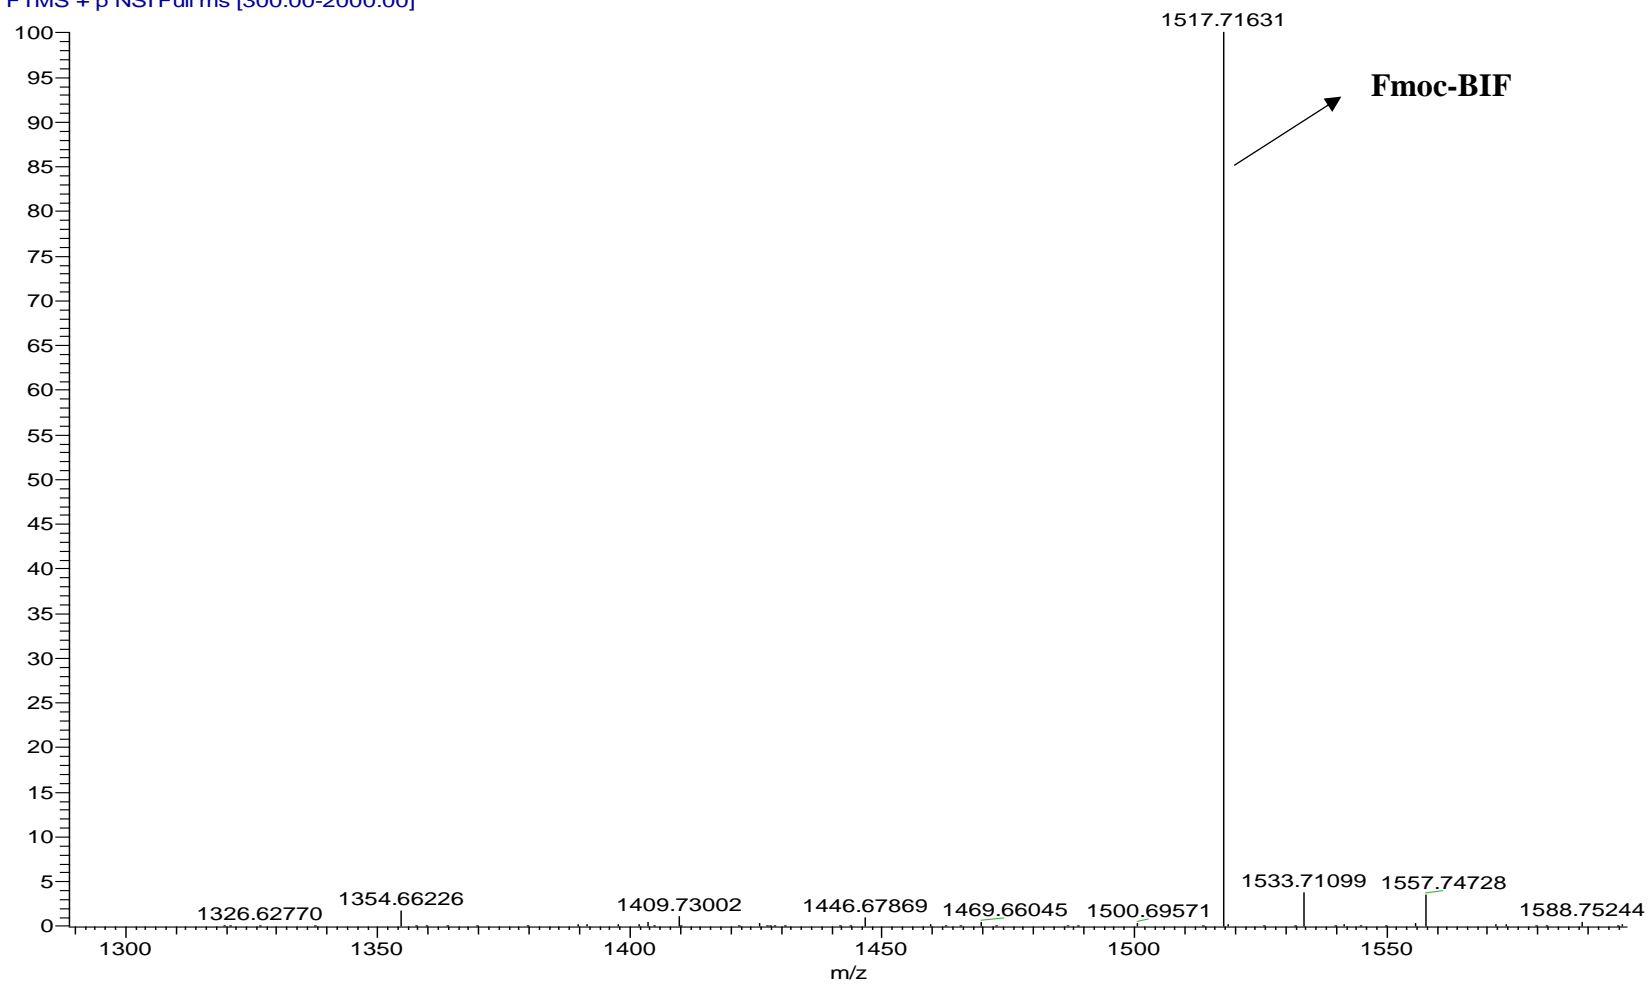

**Figure S15B.** LC-MS graph of fibrils obtained after the experiment for BIF at pH 5, 25°C, 1M urea, 0.02M NaCl showing the relative abundance of Fmoc-BIF.

Human4-1000\_XT\_00001\_M\_#2 RT: 2.00 AV: 1 NL: 2.29E7  
T: FTMS + p NSI Full ms [300.00-2000.00]

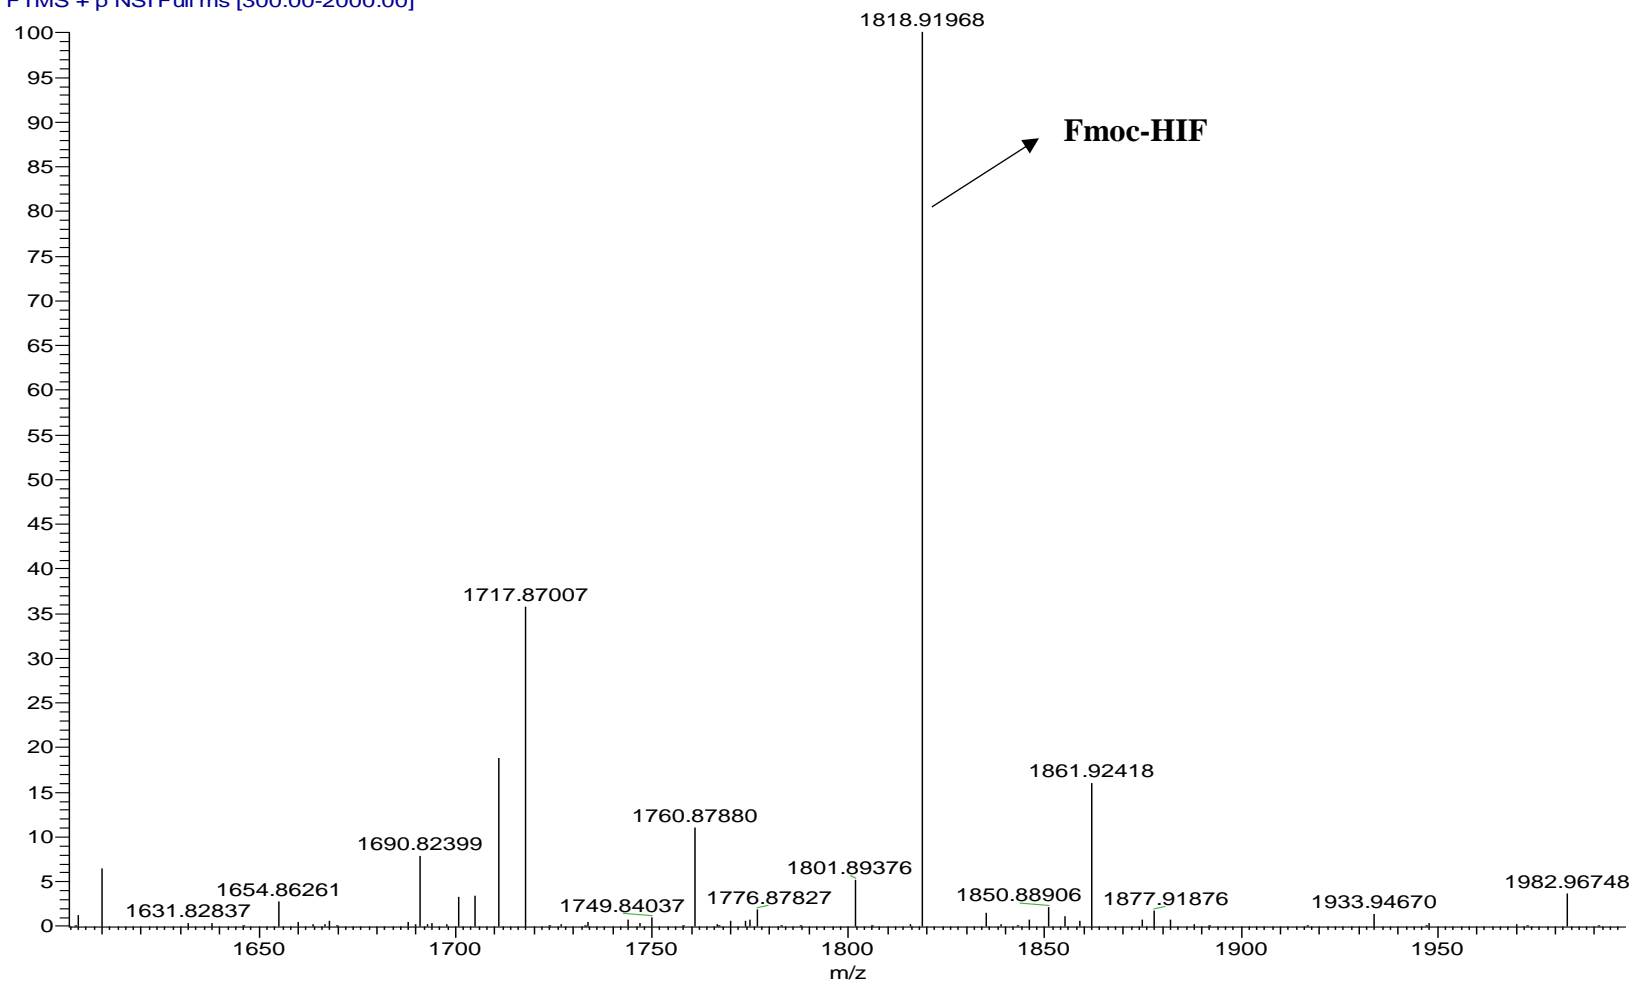

**Figure S16A.** LC-MS graph of fibrils obtained after the experiment for BIF at pH 1.6, 60°C, 1M urea, 0.02M NaCl showing the relative abundance of Fmoc-HIF.



Human6-1000\_XT\_00001\_M\_#2 RT: 2.00 AV: 1 NL: 1.49E6  
T: FTMS + p NSI Full ms [300.00-2000.00]

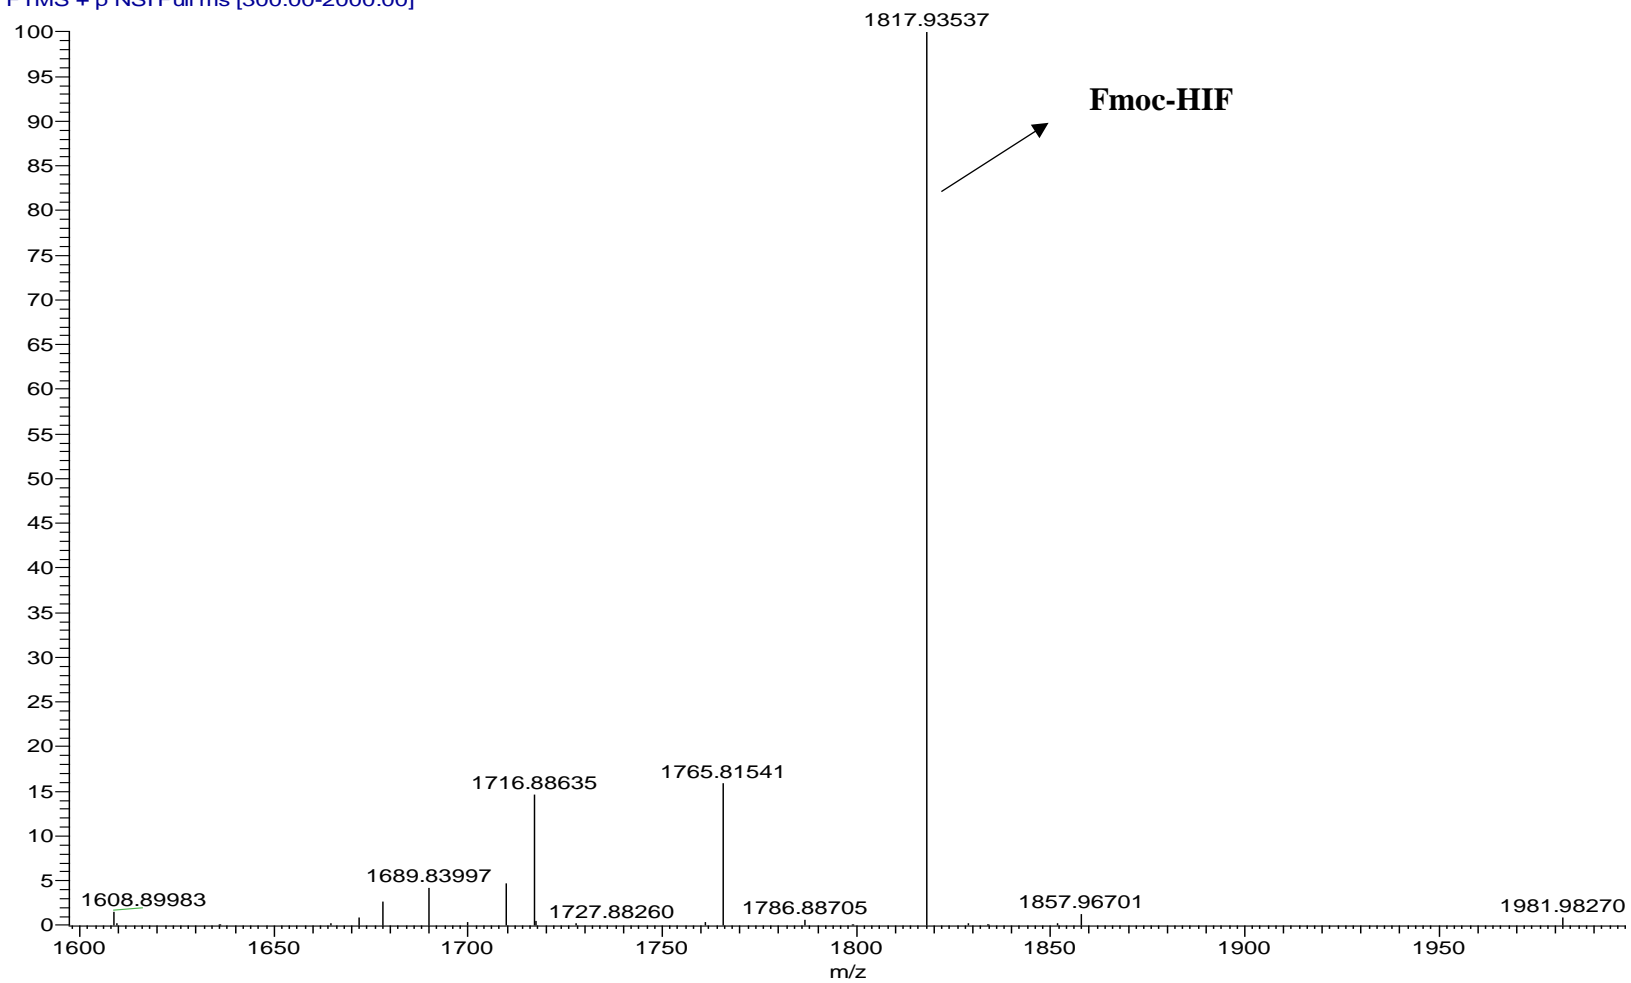

**Figure S16B.** LC-MS graph of fibrils obtained after the experiment for BIF at pH 5, 25°C, 1M urea, 0.02M NaCl showing the relative abundance of Fmoc-HIF.

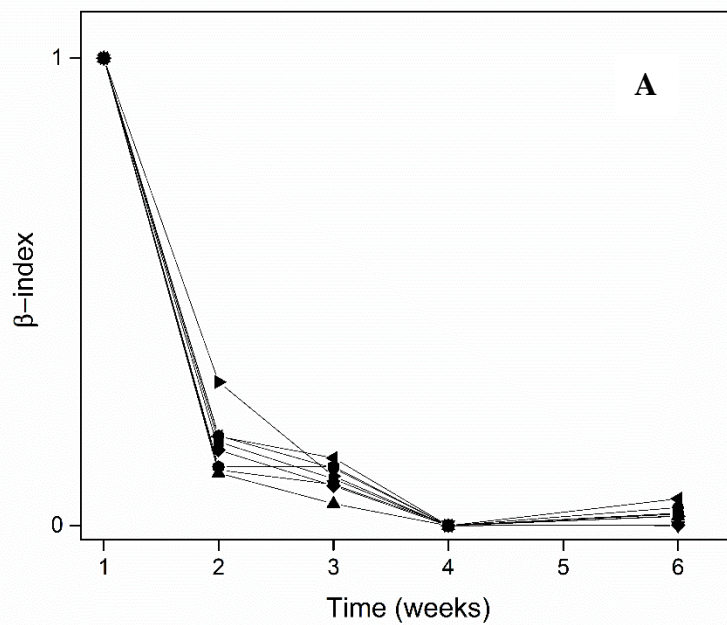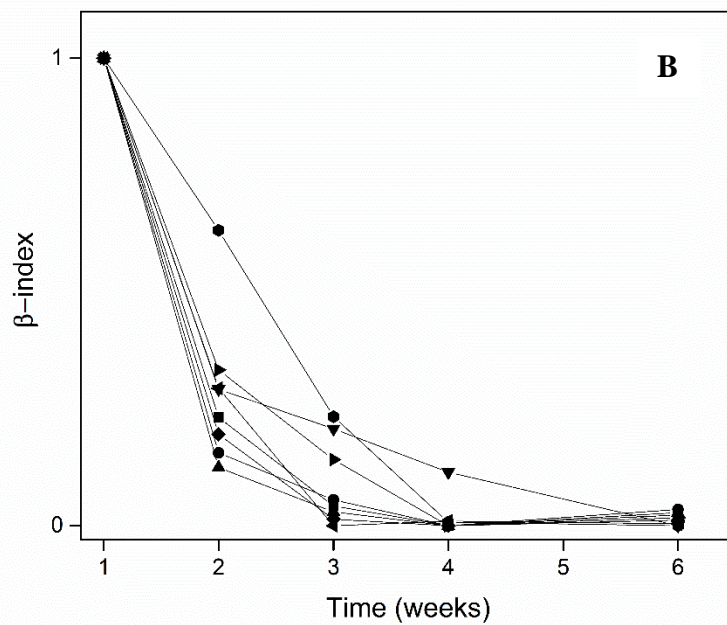

**Figure S17.**  $\beta$ -index for A) BIF and B) HIF at pH 1.6, 25°C, 0M urea, 0.02M NaCl (—■—); pH 1.6, 25°C, 1M urea, 1M NaCl (—●—); pH 1.6, 60°C, 0M urea, 1M NaCl (—▲—); pH 1.6, 60°C, 1M urea, 0.02M NaCl (—▼—); pH 5, 25°C, 0M urea, 1M NaCl (—◆—); pH 5, 25°C, 1M urea, 0.02M NaCl (—◄—); pH 5, 60°C, 0M urea, 0.02M NaCl (—►—); pH 5, 60°C, 1M urea, 1M NaCl (—●—)

**Table S1. <sup>1</sup>H NMR chemical shifts for BIF.**

| Proton chemical shift (ppm) |                |                |                |                |                |
|-----------------------------|----------------|----------------|----------------|----------------|----------------|
| Amino Acid                  | H <sub>α</sub> | H <sub>β</sub> | H <sub>γ</sub> | H <sub>δ</sub> | H <sub>ε</sub> |
| Ala                         | 4.25           | 1.35           | -              | -              | -              |
| Ser                         | 4.46           | 3.65           | -              | -              | -              |
| Val                         | 4.17           | 2.28           | 0.96           | -              | -              |
| Cys                         | 4.62           | 3.32           | -              | -              | -              |
| Leu                         | 4.35           | 1.77           | -              | 0.66           | -              |
| Tyr                         | -              | 2.84           | -              | 7.07,6.59      | -              |
| Gln                         | 4.21           | 2.09           | 2.5            | -              | 6.67           |
| Glu                         | 4.01           | 1.9            | 2.24           | -              | -              |
| Asn                         | -              | 2.76           | -              | -              | -              |
| Lys                         | 4.29           | 1.81           | 1.39           | 1.58           | 2.88           |



**Table S2. <sup>1</sup>H NMR chemical shifts for HIF.**

| Proton chemical shift (ppm) |                |                |                |                |                |
|-----------------------------|----------------|----------------|----------------|----------------|----------------|
| Amino Acid                  | H <sub>α</sub> | H <sub>β</sub> | H <sub>γ</sub> | H <sub>δ</sub> | H <sub>ε</sub> |
| Thr                         | 4.38           | 4.11           | 1.09           | -              | -              |
| Ser                         | 4.46           | 3.65           | -              | -              | -              |
| Ile                         | 3.99           | 1.78           | 1.21           | 0.67           | -              |
| Cys                         | 4.62           | 3.32           | -              | -              | -              |
| Leu                         | 4.35           | 1.77           | -              | 0.66           | -              |
| Tyr                         | -              | 2.84           | -              | 7.07,6.59      | -              |
| Gln                         | 4.21           | 2.09           | 2.5            | -              | 6.67           |
| Glu                         | 4.01           | 1.9            | 2.24           | -              | -              |
| Asn                         | -              | 2.76           | -              | -              | -              |
| Lys                         | 4.29           | 1.81           | 1.39           | 1.58           | 2.88           |

**Table S3. FTIR deconvoluted peaks corresponding to HIF at pH 1.6, 60 °C, 1M urea, 0.02M NaCl.**

| Wavenumber (cm <sup>-1</sup> ) | Week-1 | Week-6 |
|--------------------------------|--------|--------|
|                                | 1633   | 1619   |
| HIF                            | 1667   | 1649   |
|                                | 1686   | 1696   |
